# Supplementary figures and images for: Time-, space- and energy-resolved in situ characterization of catalysts by X-ray absorption spectroscopy
Source: Royal Society of Chemistry journal article supplement (doi:10.1039/d3cc03277a), 2023-01-01

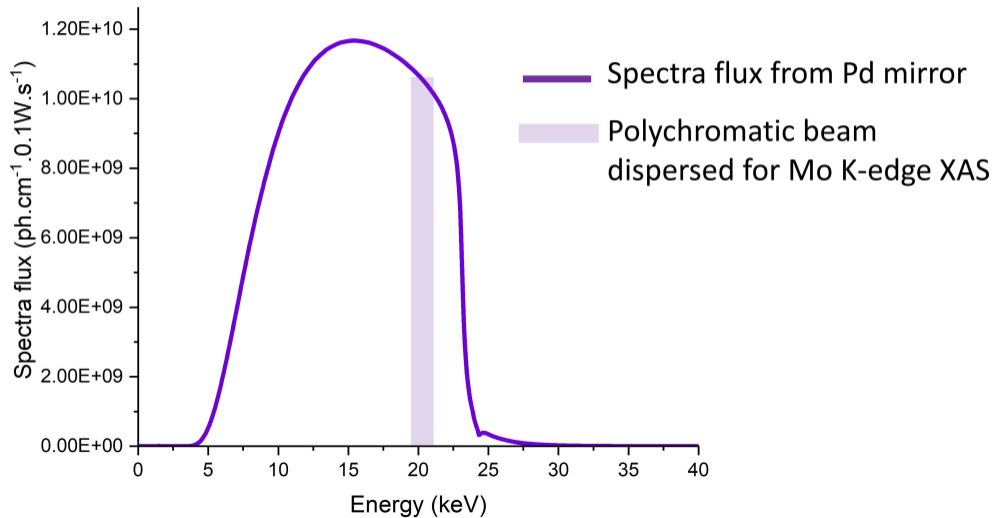

Supplement: d3cc03277a3.pdf [file d3cc03277a3.pdf]

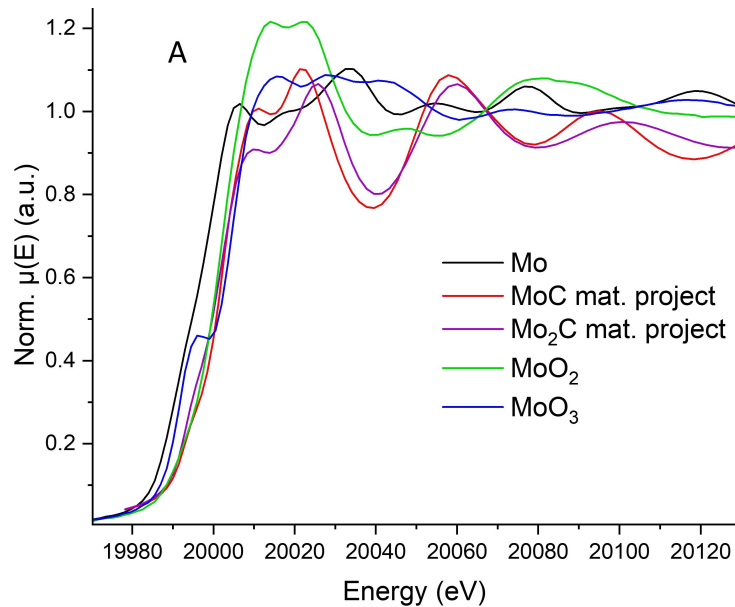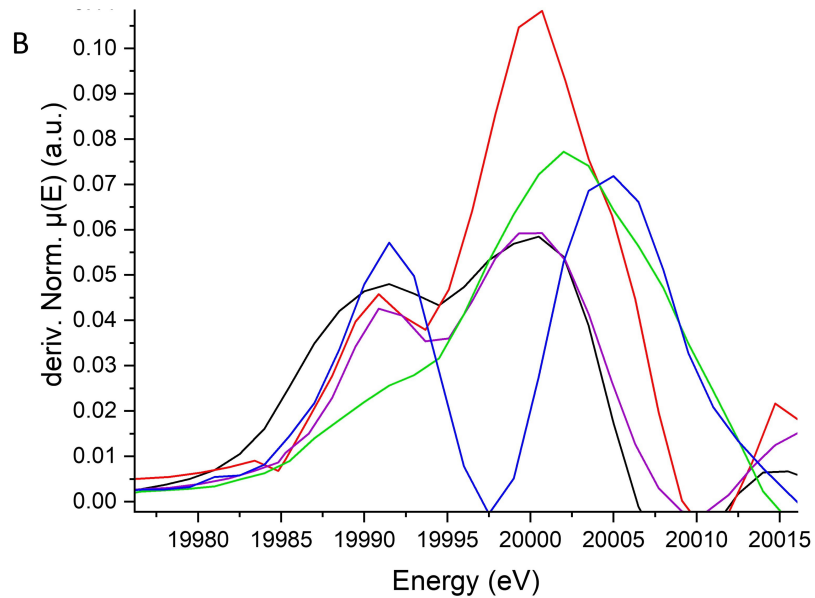

Supplement: d3cc03277a4.pdf [file d3cc03277a4.pdf]

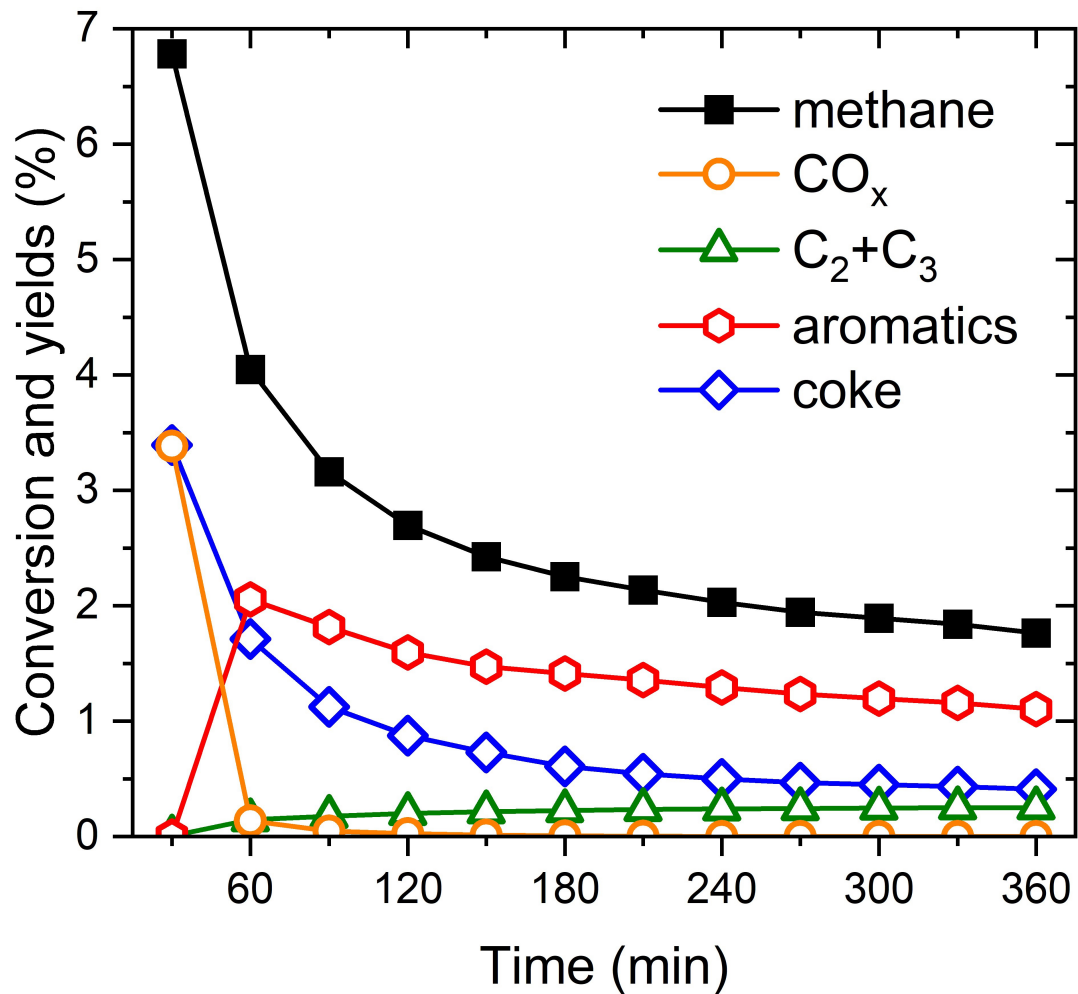

Supplement: d3cc03277a5.pdf [file d3cc03277a5.pdf]

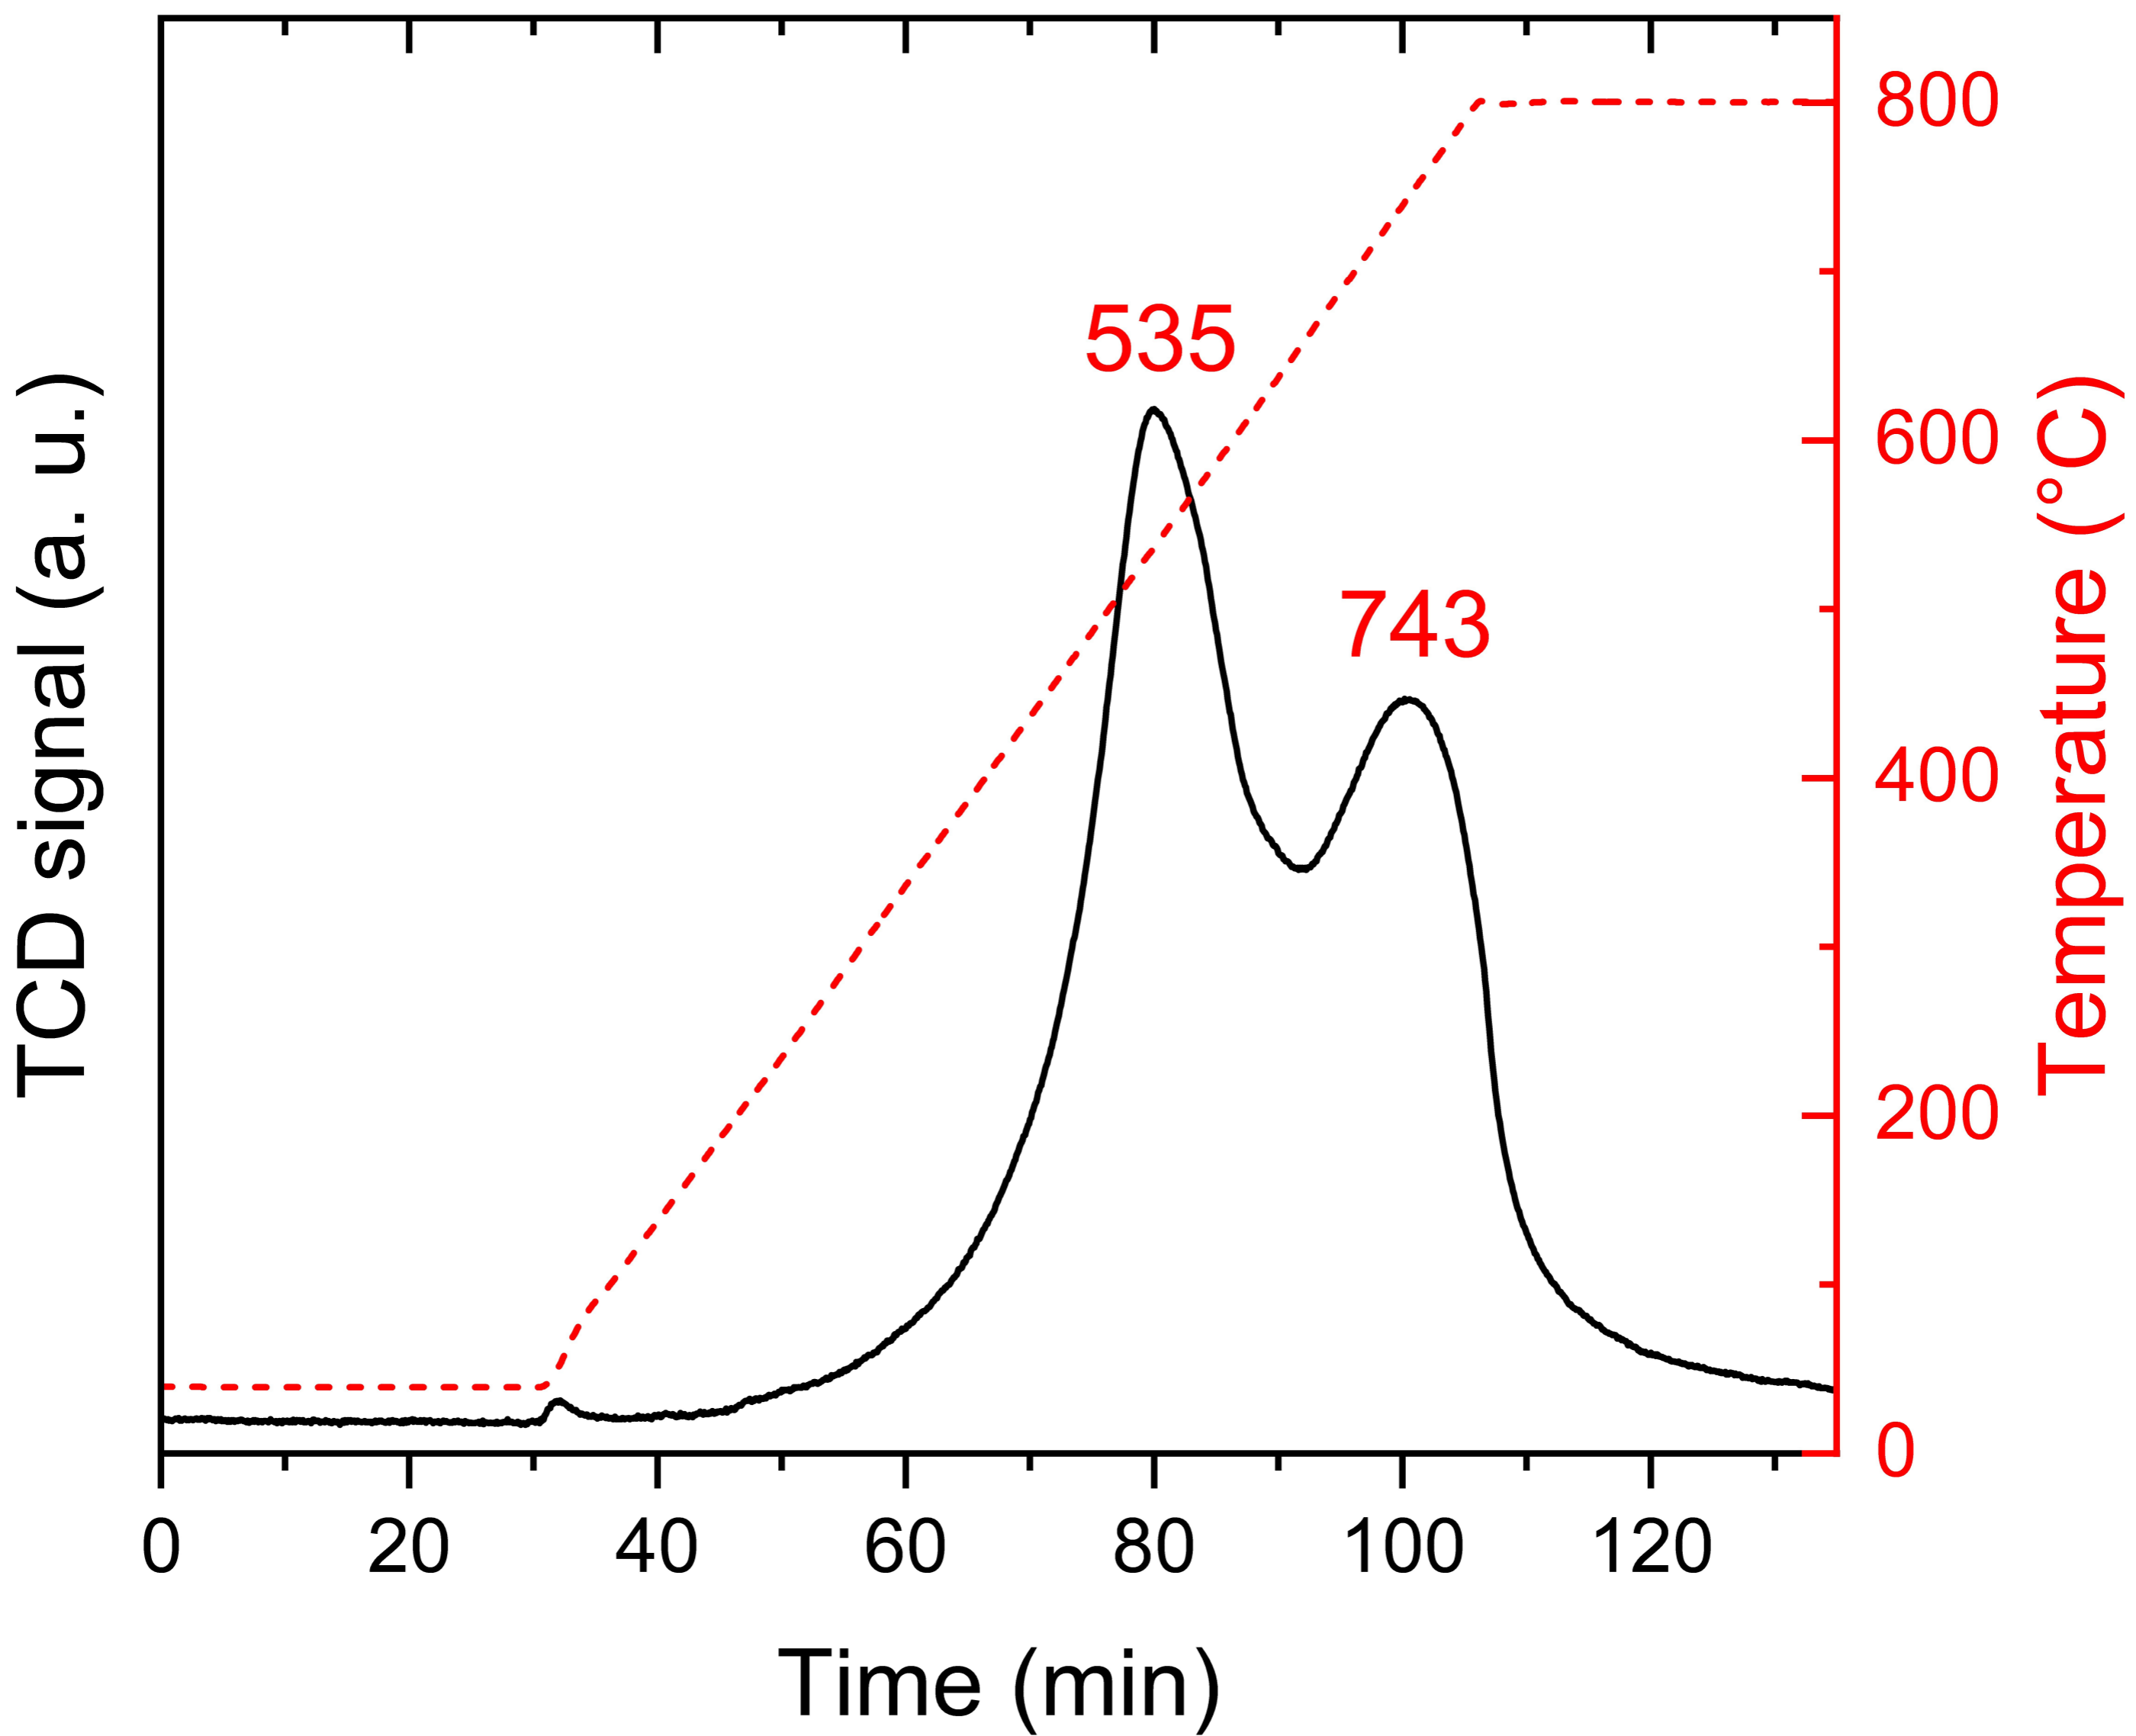

Supplement: d3cc03277a6.pdf [file d3cc03277a6.pdf]
